# Supplementary material for: Synthesis of luminescent thorium-based metal–organic frameworks with 1,2,4,5-tetrakis(4-carboxyphenyl)benzene
Source: Royal Society of Chemistry journal article supplement (doi:10.1039/d1ra01742j), 2021-01-01
Supplement: d1ra01742j1.pdf [file d1ra01742j1.pdf]

Supporting Information for

**Synthesized of luminescent thorium-based metal-organic frameworks with 1,2,4,5- tetrakis (4- carboxyphenyl) benzene**

Ting Yu<sup>†a</sup>, Zheng-hua Qian<sup>b</sup>, Lin Li<sup>b, c</sup>, Xiao-ling Wu<sup>b, c</sup>, Hui He<sup>a</sup>, Yan-bo Qiao<sup>b</sup>, Guo-an Ye<sup>\*a</sup>

<sup>a</sup>. China Institute of Atomic Energy, Department of Radiochemistry, Beijing 102413, China.

<sup>b</sup>. Shanghai Institute of Applied Physics, Chinese Academy of Sciences, Shanghai 201800, China

<sup>c</sup>. University of Chinese Academy of Sciences, Beijing 100049, China

\* Corresponding Author Email: yeguoaan@ciae.ac.cn

**Tables and Figures**

Table S1. Crystallographic Data for Compound 1-3.

| Compound                                   | 1                                                    | 2                                                               | 3                                                    |
|--------------------------------------------|------------------------------------------------------|-----------------------------------------------------------------|------------------------------------------------------|
| Empirical formula                          | C <sub>34</sub> H <sub>18</sub> O <sub>8</sub> Th    | C <sub>34</sub> H <sub>18</sub> O <sub>15</sub> Th <sub>2</sub> | C <sub>37</sub> H <sub>27</sub> NO <sub>10</sub> Th  |
| Formula weight                             | 786.52                                               | 1130.56                                                         | 877.63                                               |
| Temperature/K                              | 293(2)                                               | 170.0                                                           | 189.7                                                |
| Crystal system                             | monoclinic                                           | orthorhombic                                                    | monoclinic                                           |
| Space group                                | P2/n                                                 | Cmca                                                            | P2 <sub>1</sub> /n                                   |
| a /Å                                       | 5.640(3)                                             | 33.443(2)                                                       | 12.0770(15)                                          |
| b /Å                                       | 11.024(6)                                            | 16.4404(9)                                                      | 31.421(4)                                            |
| c /Å                                       | 28.315(15)                                           | 20.0127(12)                                                     | 14.830(2)                                            |
| α /°                                       | 90                                                   | 90                                                              | 90                                                   |
| β /°                                       | 92.102(12)                                           | 90                                                              | 112.117(4)                                           |
| γ /°                                       | 90                                                   | 90                                                              | 90                                                   |
| Volume /Å <sup>3</sup>                     | 1759.3(16)                                           | 11003.4(11)                                                     | 5213.5(12)                                           |
| Z                                          | 2                                                    | 8                                                               | 4                                                    |
| ρ <sub>calc</sub> g/cm <sup>3</sup>        | 1.485                                                | 1.365                                                           | 1.118                                                |
| μ /mm <sup>-1</sup>                        | 9.221                                                | 11.747                                                          | 6.275                                                |
| F(000)                                     | 752.0                                                | 4176.0                                                          | 1704.0                                               |
| Crystal size /mm <sup>3</sup>              | 0.006×0.005×0.003                                    | 0.05×0.03×0.02                                                  | 0.006×0.005×0.003                                    |
| Radiation                                  | GaKα (λ = 1.34139)                                   | GaKα (λ = 1.34139)                                              | GaKα (λ = 1.34139)                                   |
| 2θ range for data collection/°             | 15.674 to 110.372                                    | 6.476 to 109.892                                                | 6.108 to 109.996                                     |
| Index ranges                               | -6 ≤ h ≤ 6, 0 ≤ k ≤ 13, 0 ≤ l ≤ 34                   | -40 ≤ h ≤ 39, -16 ≤ k ≤ 24                                      | -14 ≤ h ≤ 14, -38 ≤ k ≤ 18                           |
| Reflections collected                      | 3260                                                 | 30910                                                           | 44198                                                |
| Data/restraints/parameters                 | 3260/109/172                                         | 5329/357/234                                                    | 9616/0/445                                           |
| Goodness-of-fit on F <sup>2</sup>          | 1.064                                                | 1.061                                                           | 1.042                                                |
| Final R indexes [I ≥ 2σ (I)]               | R <sub>1</sub> = 0.0970,<br>wR <sub>2</sub> = 0.2586 | R <sub>1</sub> = 0.0808,<br>wR <sub>2</sub> = 0.2164            | R <sub>1</sub> = 0.0949,<br>wR <sub>2</sub> = 0.2562 |
| Final R indexes [all data]                 | R <sub>1</sub> = 0.1190,<br>wR <sub>2</sub> = 0.2768 | R <sub>1</sub> = 0.0997,<br>wR <sub>2</sub> = 0.2356            | R <sub>1</sub> = 0.1238,<br>wR <sub>2</sub> = 0.2882 |
| Largest diff. peak/hole /e Å <sup>-3</sup> | 4.03/-3.27                                           | 14.78/-3.03                                                     | 3.89/-2.29                                           |

Table S2. Selected bond distances [ $\text{\AA}$ ] for Compound 1-3.

| Assignment          | Bond Distances | Compound 1 | Bond Distances | Compound 2 | Bond Distances | Compound 3 |
|---------------------|----------------|------------|----------------|------------|----------------|------------|
| Th-Th               |                |            | Th(1)-Th(1A)   | 3.9322(9)  |                |            |
| Th-O <sup>2-</sup>  |                |            | Th(1)-O(1)     | 2.332(3)   |                |            |
|                     |                |            | Th(1)-O(2 )    | 2.389(7)   |                |            |
|                     |                |            | Th(1)-O(2A)    | 2.327(7)   |                |            |
| Th-O <sub>CO-</sub> | Th(1)-O(1)     | 2.524(14)  | Th(1)-O(3A)    | 2.418(9)   | Th(1)-O(1)     | 2.452(8)   |
|                     | Th(1)-O(1A)    | 2.524(15)  | Th(1)-O(4 )    | 2.470(9)   | Th(1)-O(2A)    | 2.393(9)   |
|                     | Th(1)-O(2)     | 2.451(13)  | Th(1)-O(5B)    | 2.370(10)  | Th(1)-O(3B)    | 2.578(10)  |
|                     | Th(1)-O(2A)    | 2.451(13)  | Th(1)-O(8C)    | 2.444(10)  | Th(1)-O(4B)    | 2.481(10)  |
|                     | Th(1)-O(3D)    | 2.443(14)  |                |            | Th(1)-O(5C)    | 2.458(9)   |
|                     | Th(1)-O(3E)    | 2.443(14)  |                |            | Th(1)-O(6D)    | 2.405(12)  |
|                     | Th(1)-O(4B)    | 2.390(15)  |                |            | Th(1)-O(8E)    | 2.379(10)  |
|                     | Th(1)-O(4C)    | 2.390(15)  |                |            | Th(1)-O(10)    | 2.483(11)  |
| Th-O <sub>w</sub>   |                |            | Th(1)-O(6 )    | 2.541(10)  | Th(1)-O(9)     | 2.485(12)  |
|                     |                |            | Th(1)-O(7 )    | 2.361(18)  |                |            |

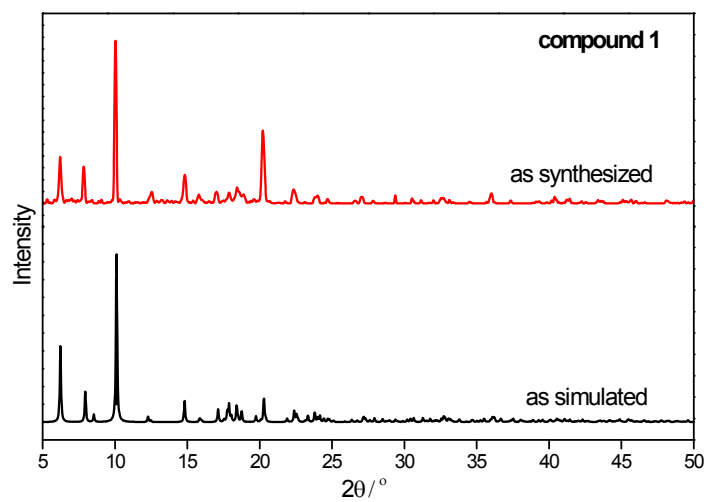

(a)

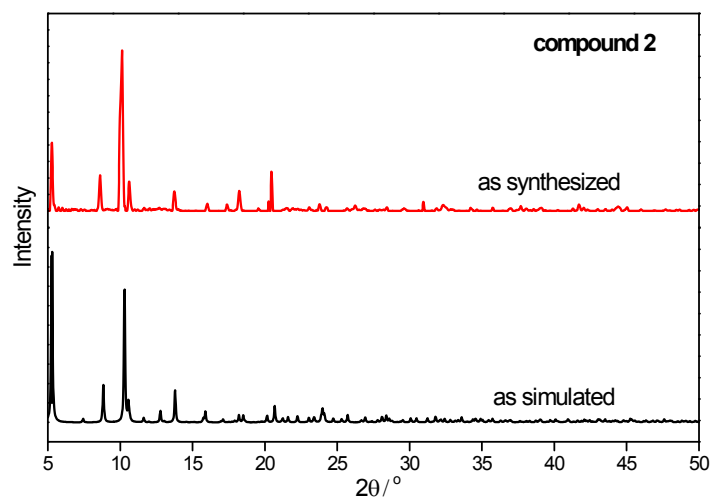

(b)

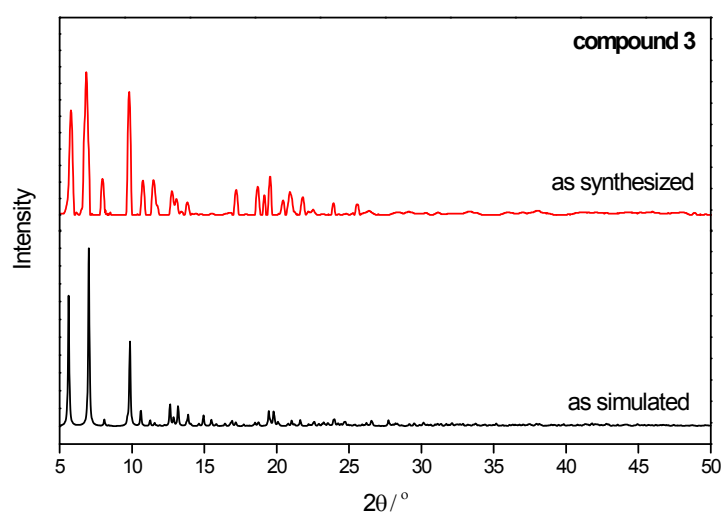

(c)

Fig. S1 PXRD patterns of as-synthesized and as-simulated compound 1, 2, and 3

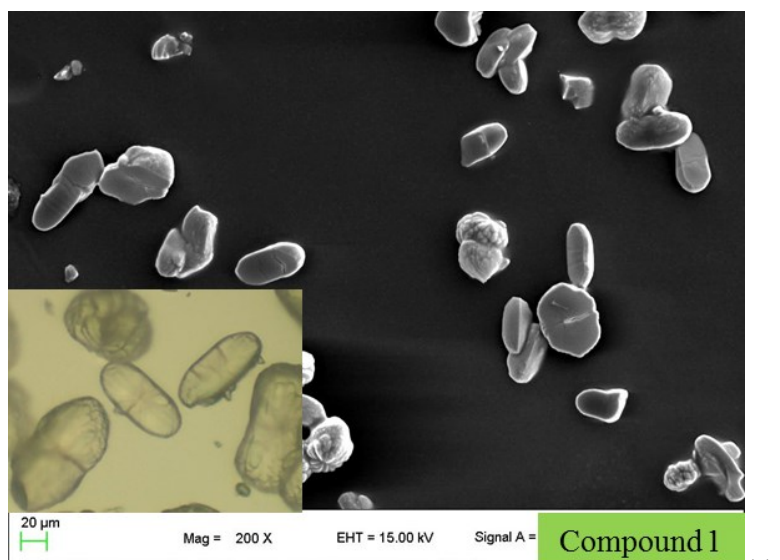

(a)

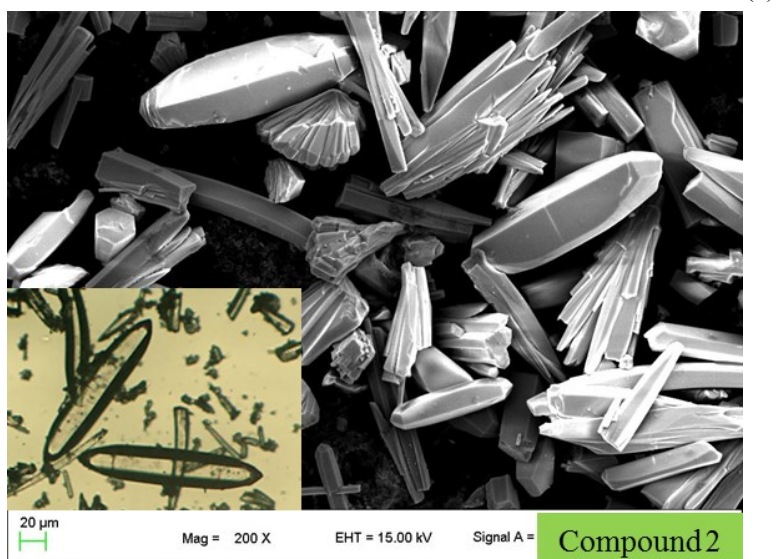

(b)

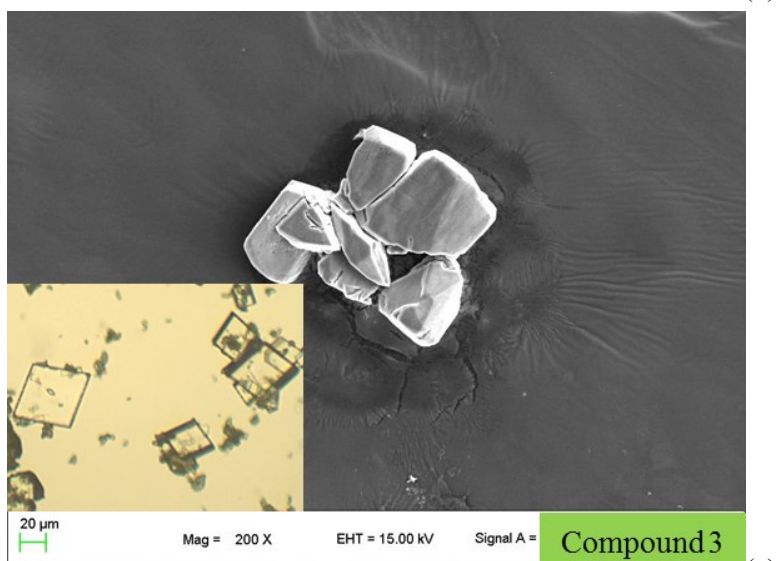

(c)

Fig. S2 SEM images of compound 1, 2, and 3

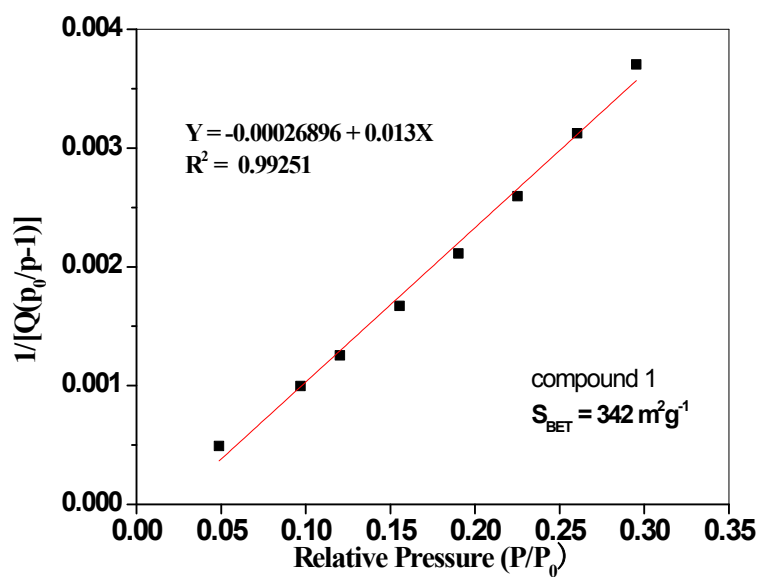

(a)

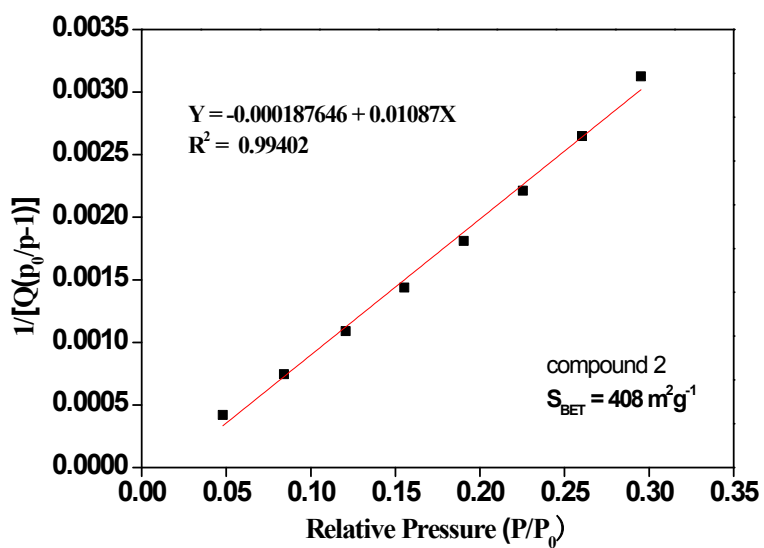

(b)

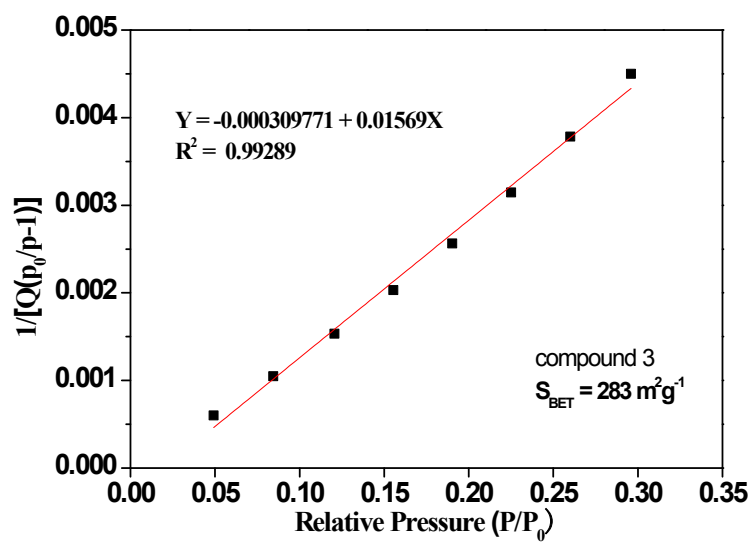

(c)

Fig. S3 BET Surface area plots of compound 1, 2, and 3.

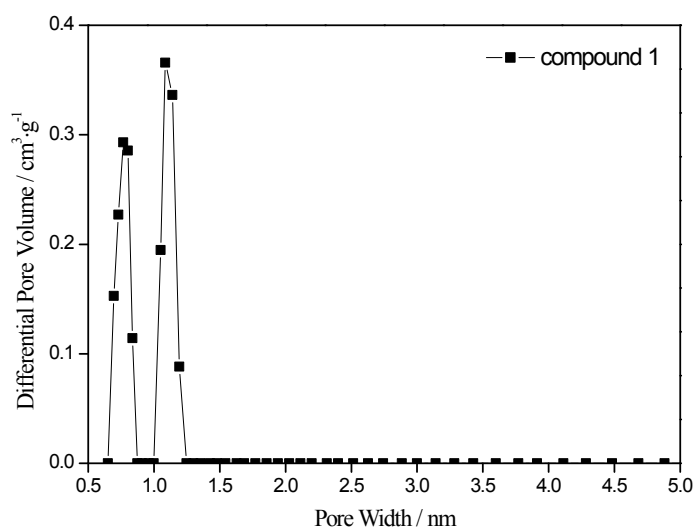

(a)

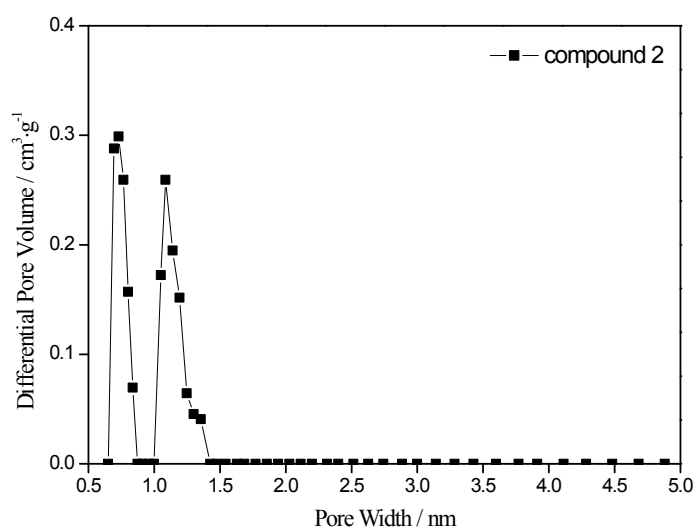

(b)

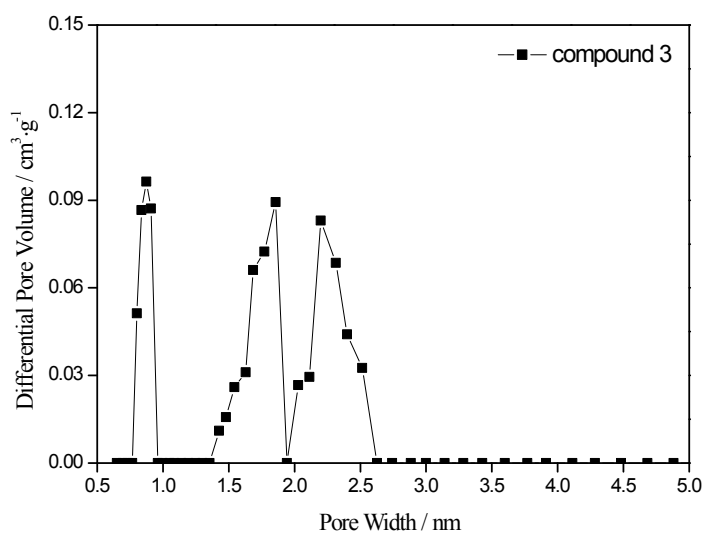

(c)

Fig. S4 Pore-size distribution of compound 1, 2, and 3

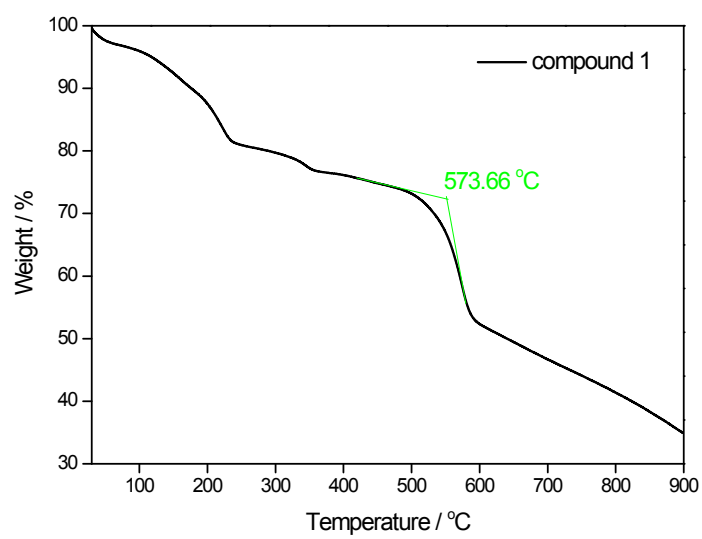

(a)

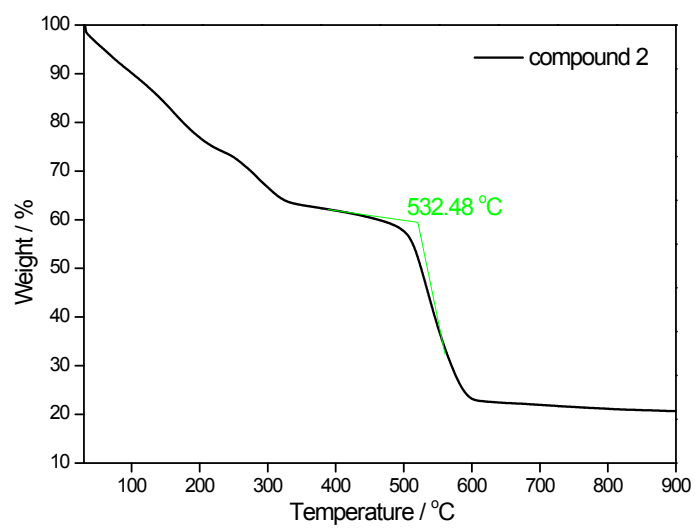

(b)



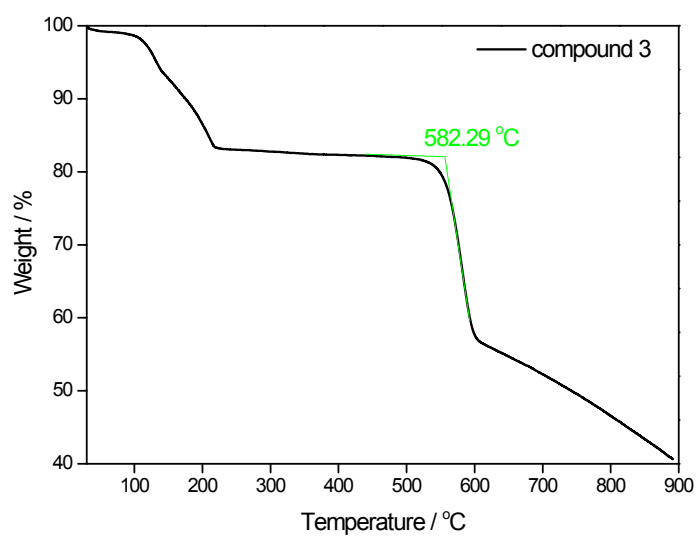

(c)

Fig. S5 The TGA plots of compound 1, 2, and 3

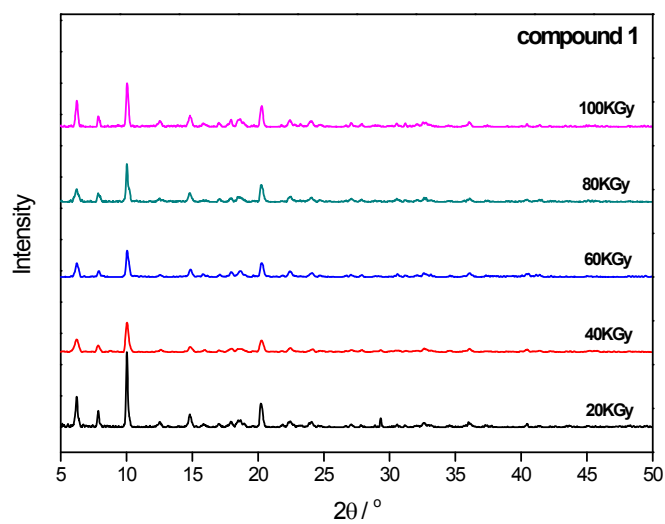

(a)

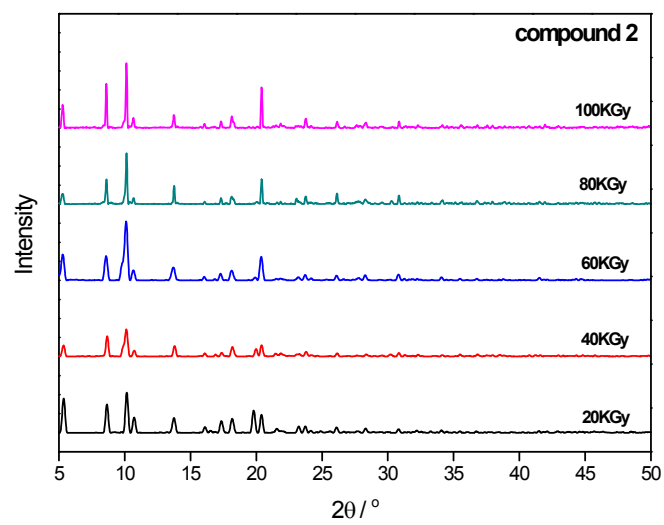

(b)

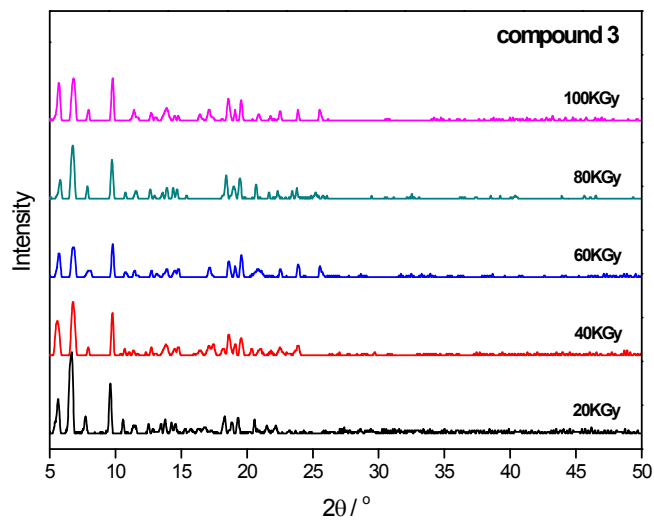

(c)

Fig. S6 PXRD patterns of compound 1, 2, and 3 under different doses of  $\gamma$  irradiation

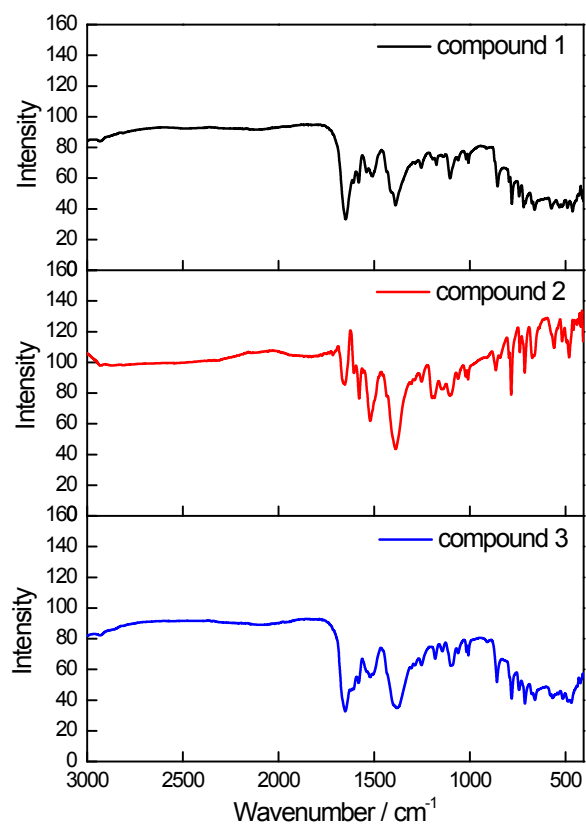

Fig. S7 IR spectra of compound 1, 2, and 3

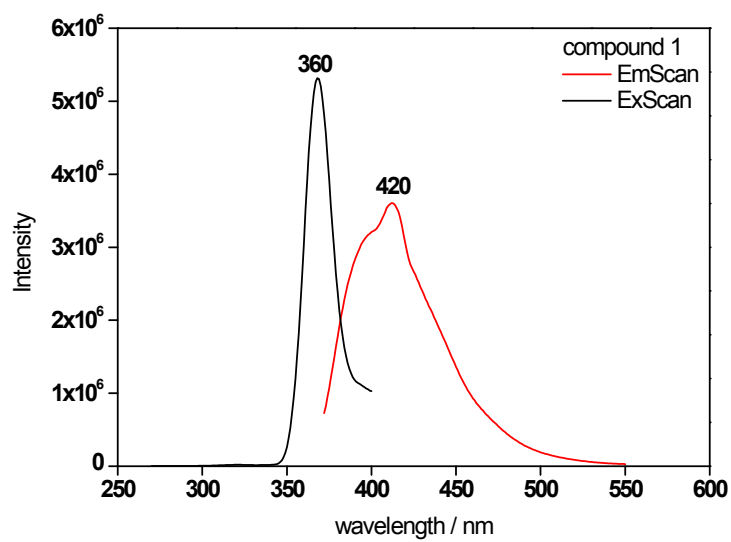

(a)

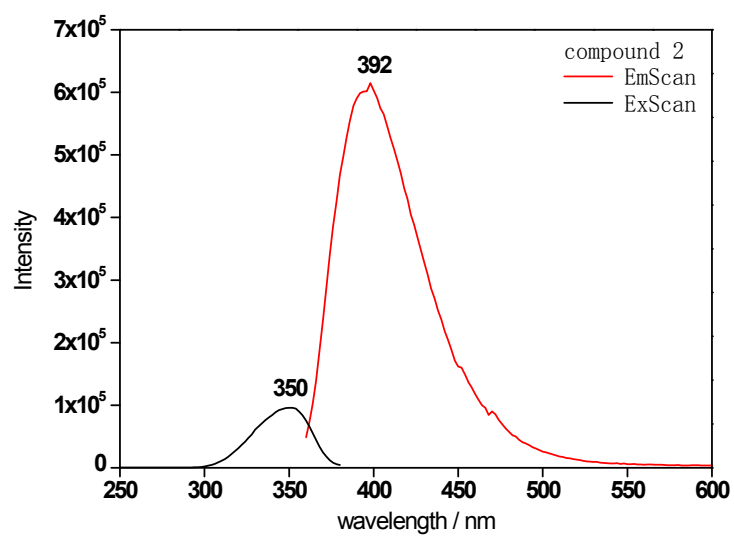

(b)

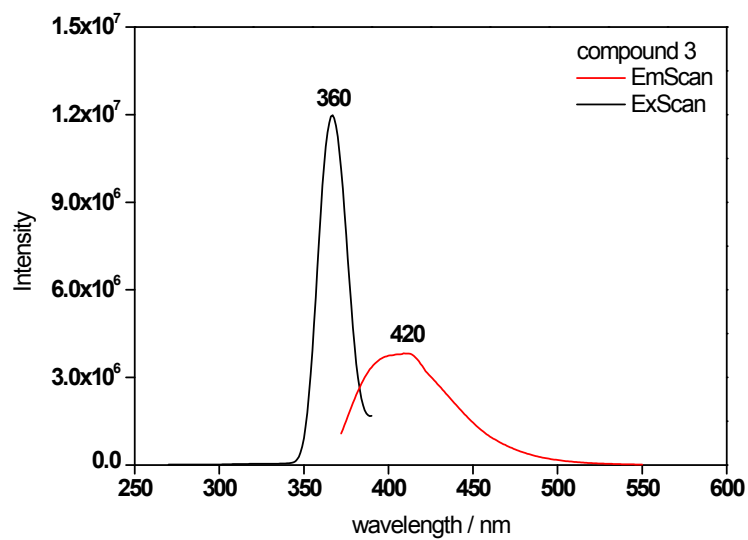

(c)

Fig. S8 Emission spectra and excitation spectra of compound 1, 2, and 3
